# Supplementary material
Source: Elsevier journal article supplement (https://www.sciencedirect.com/science/article/pii/S0213911120301175)
Supplement: mmc1 [file S0213911120301175:mmc1.pdf]

**Supplementary table 1.** Distribution of social class categories by Autonomous Community in women (N=10712) and men (N=9694) participants

| Autonomous Community | Social class categories <sup>1</sup> |       |       |       |       |       |       |       |       |       |       |       |
|----------------------|--------------------------------------|-------|-------|-------|-------|-------|-------|-------|-------|-------|-------|-------|
|                      | Women                                |       |       |       |       |       | Men   |       |       |       |       |       |
|                      | I                                    | II    | III   | IV    | V     | VI    | I     | II    | III   | IV    | V     | VI    |
| Andalucia            | 8.1%                                 | 7.5%  | 17.6% | 11.7% | 32.4% | 22.6% | 9.0%  | 7.2%  | 20.5% | 13.7% | 29.9% | 19.6% |
| Aragon               | 10.2%                                | 7.0%  | 16.2% | 13.8% | 36.5% | 16.3% | 10.1% | 9.5%  | 19.0% | 18.6% | 35.9% | 6.9%  |
| Asturias             | 7.1%                                 | 5.6%  | 20.8% | 13.9% | 42.0% | 10.5% | 9.8%  | 5.1%  | 16.1% | 16.5% | 43.6% | 8.9%  |
| Balears              | 9.5%                                 | 8.2%  | 25.3% | 13.5% | 34.8% | 8.7%  | 7.9%  | 9.2%  | 23.0% | 17.2% | 35.9% | 6.7%  |
| Canarias             | 8.8%                                 | 7.9%  | 19.8% | 11.6% | 31.2% | 20.8% | 8.1%  | 7.7%  | 18.8% | 16.0% | 36.4% | 13.1% |
| Cantabria            | 8.4%                                 | 8.7%  | 22.3% | 8.5%  | 40.7% | 11.4% | 9.1%  | 5.4%  | 16.5% | 20.8% | 42.4% | 5.8%  |
| Castilla - La Mancha | 6.9%                                 | 5.1%  | 18.2% | 12.5% | 44.7% | 12.6% | 8.0%  | 6.0%  | 16.7% | 16.3% | 38.1% | 14.9% |
| Castilla y Leon      | 8.0%                                 | 7.4%  | 19.7% | 12.8% | 38.6% | 13.5% | 10.6% | 6.4%  | 13.7% | 17.4% | 40.2% | 11.8% |
| Catalunya            | 13.1%                                | 7.9%  | 21.5% | 12.6% | 32.1% | 12.8% | 13.8% | 8.7%  | 20.0% | 17.3% | 30.5% | 9.7%  |
| Comunitat Valenciana | 11.4%                                | 8.1%  | 17.8% | 15.1% | 33.8% | 13.8% | 8.3%  | 8.7%  | 17.3% | 18.3% | 37.1% | 10.3% |
| Extremadura          | 8.4%                                 | 7.7%  | 15.6% | 10.9% | 36.2% | 21.3% | 6.1%  | 4.2%  | 16.2% | 12.2% | 41.2% | 20.1% |
| Galicia              | 8.4%                                 | 6.6%  | 15.4% | 14.4% | 43.7% | 11.5% | 10.4% | 5.0%  | 15.5% | 18.4% | 40.2% | 10.4% |
| La Rioja             | 8.1%                                 | 4.8%  | 20.0% | 18.2% | 37.8% | 11.1% | 11.2% | 8.8%  | 12.2% | 16.3% | 40.1% | 11.4% |
| Madrid               | 19.1%                                | 12.0% | 23.5% | 11.4% | 22.3% | 11.7% | 19.9% | 11.2% | 20.7% | 11.0% | 25.6% | 11.7% |
| Murcia               | 9.1%                                 | 6.6%  | 16.9% | 12.0% | 28.6% | 26.8% | 8.8%  | 7.3%  | 17.0% | 13.0% | 25.6% | 28.3% |
| Navarra              | 15.3%                                | 7.7%  | 17.4% | 14.7% | 33.7% | 11.1% | 11.0% | 8.3%  | 18.4% | 21.4% | 32.8% | 8.0%  |
| Pais Vasco           | 11.9%                                | 9.5%  | 17.7% | 17.6% | 32.2% | 11.1% | 13.6% | 7.5%  | 19.2% | 19.7% | 32.1% | 8.0%  |

1 Social class classification: (I) Higher grade professionals, administrators, and officials; managers in large industrial establishments; (II) Lower grade professionals, administrators and officials; higher grade technicians; managers in small industrial establishments; sportspeople and artists; (III) Intermediate occupations and own-account workers; (IV) Lower supervisory and technical occupations; (V) Skilled workers workers in primary production and other semi-skilled workers; (VI) non-skilled workers
