# Supplementary material
Source: Elsevier journal article supplement (https://www.sciencedirect.com/science/article/pii/S0213911120301175)
Supplement: mmc2 [file S0213911120301175:mmc2.pdf]

**Supplementary table 2.** Prevalence of cardiovascular risk factor (High cholesterol, diabetes, hypertension, obesity, and current smoking) by Autonomous Community in women (N=10712) and men (N=9694) participants

| Autonomous Community | Cardiovascular risk factors |          |              |         |                 |                  |          |              |         |                 |
|----------------------|-----------------------------|----------|--------------|---------|-----------------|------------------|----------|--------------|---------|-----------------|
|                      | Female                      |          |              |         |                 | Male             |          |              |         |                 |
|                      | High Cholesterol            | Diabetes | Hypertension | Obesity | Current smoking | High Cholesterol | Diabetes | Hypertension | Obesity | Current smoking |
| Andalucia            | 18.2%                       | 8.0%     | 24.0%        | 19.8%   | 22.9%           | 19.8%            | 9.6%     | 23.2%        | 22.5%   | 30.5%           |
| Aragon               | 21.0%                       | 8.8%     | 23.6%        | 14.3%   | 24.0%           | 23.2%            | 8.4%     | 25.8%        | 17.3%   | 30.7%           |
| Asturias             | 26.4%                       | 9.9%     | 28.5%        | 20.5%   | 23.6%           | 28.2%            | 8.3%     | 27.8%        | 22.8%   | 32.6%           |
| Balears              | 15.9%                       | 4.2%     | 12.2%        | 11.0%   | 26.6%           | 15.6%            | 5.8%     | 16.2%        | 19.5%   | 31.3%           |
| Canarias             | 19.1%                       | 10.0%    | 24.2%        | 21.1%   | 21.5%           | 18.4%            | 11.3%    | 21.1%        | 17.6%   | 27.5%           |
| Cantabria            | 18.3%                       | 5.6%     | 25.2%        | 15.8%   | 22.7%           | 16.4%            | 7.5%     | 20.9%        | 19.6%   | 31.0%           |
| Castilla - La Mancha | 16.8%                       | 5.6%     | 22.2%        | 20.2%   | 26.7%           | 21.6%            | 9.5%     | 26.7%        | 20.3%   | 32.1%           |
| Castilla y Leon      | 20.3%                       | 6.0%     | 21.1%        | 9.1%    | 25.7%           | 26.4%            | 9.6%     | 26.9%        | 17.2%   | 25.9%           |
| Catalunya            | 20.8%                       | 6.1%     | 21.3%        | 17.5%   | 20.2%           | 23.0%            | 9.2%     | 23.2%        | 12.4%   | 31.0%           |
| Comunitat Valenciana | 19.5%                       | 8.4%     | 21.2%        | 17.1%   | 24.3%           | 19.5%            | 8.9%     | 23.1%        | 20.6%   | 30.9%           |
| Extremadura          | 17.3%                       | 7.7%     | 20.9%        | 16.0%   | 24.1%           | 22.0%            | 9.9%     | 23.3%        | 22.6%   | 31.7%           |
| Galicia              | 29.2%                       | 8.8%     | 26.7%        | 18.3%   | 16.8%           | 29.2%            | 9.9%     | 27.2%        | 18.6%   | 21.1%           |
| La Rioja             | 22.4%                       | 5.6%     | 23.9%        | 14.6%   | 21.7%           | 22.5%            | 6.5%     | 20.5%        | 15.5%   | 26.9%           |
| Madrid               | 19.8%                       | 7.7%     | 21.2%        | 14.8%   | 20.1%           | 22.8%            | 8.0%     | 22.8%        | 17.1%   | 26.5%           |
| Murcia               | 17.9%                       | 6.5%     | 21.4%        | 15.4%   | 21.0%           | 14.8%            | 8.2%     | 21.7%        | 17.1%   | 32.8%           |
| Navarra              | 22.6%                       | 7.0%     | 19.6%        | 14.0%   | 18.3%           | 24.3%            | 9.1%     | 30.1%        | 17.1%   | 29.6%           |
| Pais Vasco           | 20.0%                       | 5.1%     | 23.9%        | 13.6%   | 20.6%           | 22.9%            | 10.0%    | 24.3%        | 14.1%   | 25.6%           |
