# Supplementary material
Source: Elsevier journal article supplement (https://www.sciencedirect.com/science/article/pii/S0213911120301175)
Supplement: mmc5 [file S0213911120301175:mmc5.pdf]

## Relative Index of Inequality (RII) vs Slope Index of Inequality (SII)

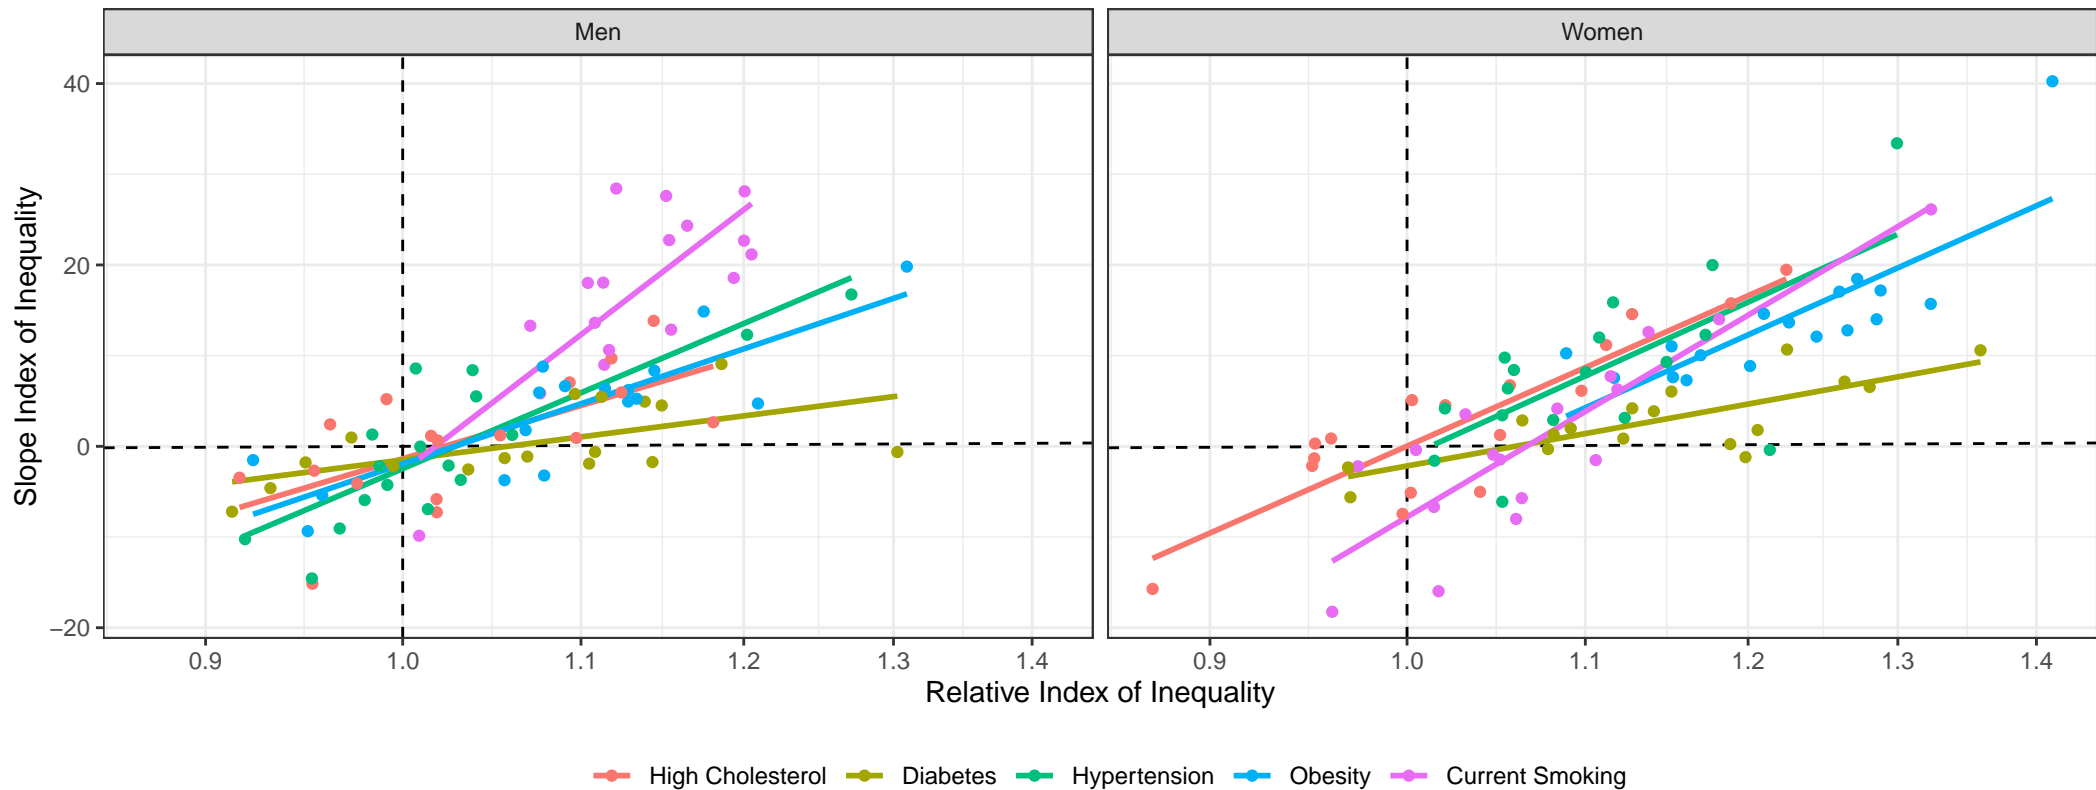

Each dot represents one Autonomous Community
